# Supplementary material
Source: Elsevier journal article supplement (https://www.sciencedirect.com/science/article/pii/S1413867021000787)
Supplement: mmc1 [file S1413867021000787:mmc1.pdf]

# SUPPLEMENTARY FILE

## Unraveling COVID-19-related hospital costs: The impact of clinical and demographic conditions

Miethke-Morais et al. 2020.

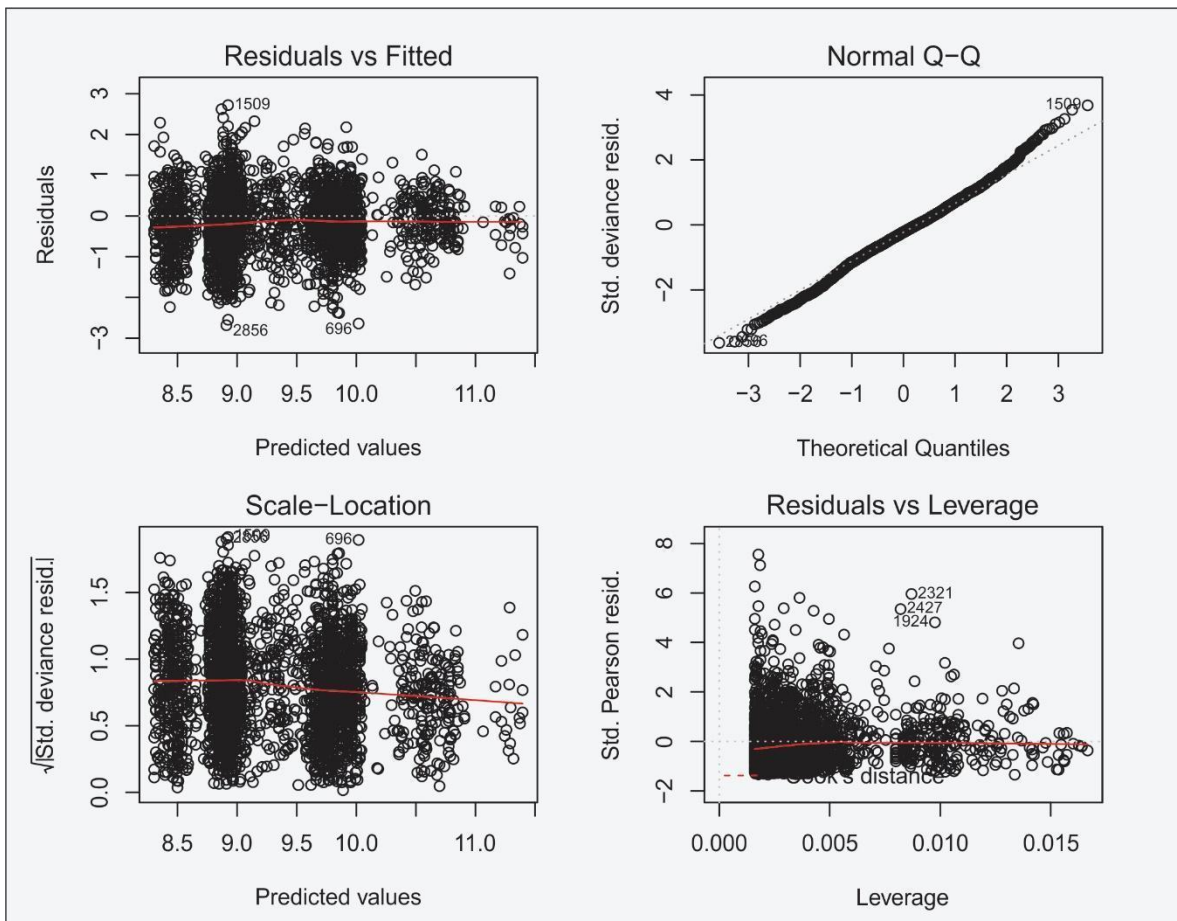

**Supplementary Figure 1.** Basic diagnostic plot of the multiple gamma generalized linear models (GLMs) for  $y$  with a log link function

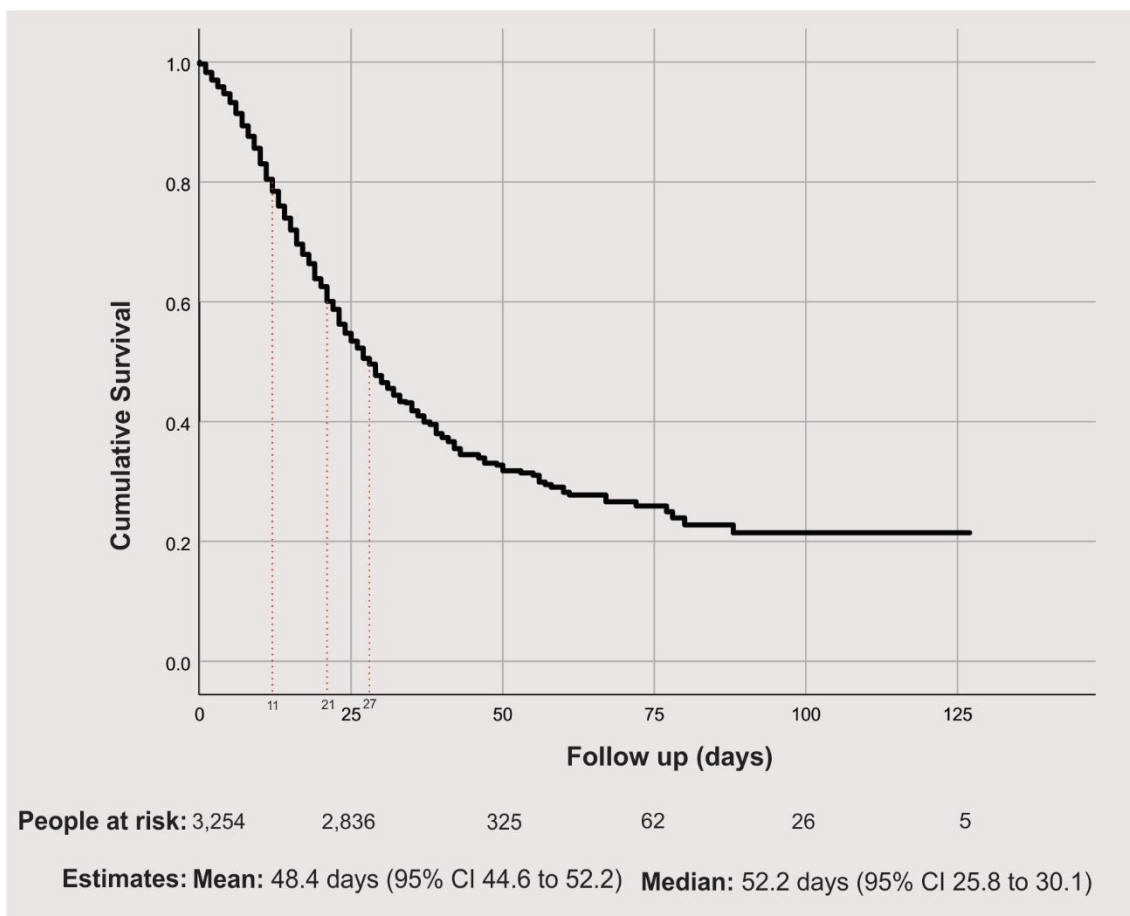

**Supplementary Figure 2.** General survival, where dotted red lines indicate a 20%, 40% and 50% risk of death
